# Supplementary material for: Parallel ClickSeq and Nanopore sequencing elucidates the rapid evolution of defective-interfering RNAs in Flock House virus
Source: PubMed Central journal article supplement (PMC5435362; doi:10.1371/journal.ppat.1006365), 2017-05-05

## Supplemental Figure 4:

Composit of TABLET Viewer alignment of Passage 4 MinION Nanopore data to FHV RNA 2

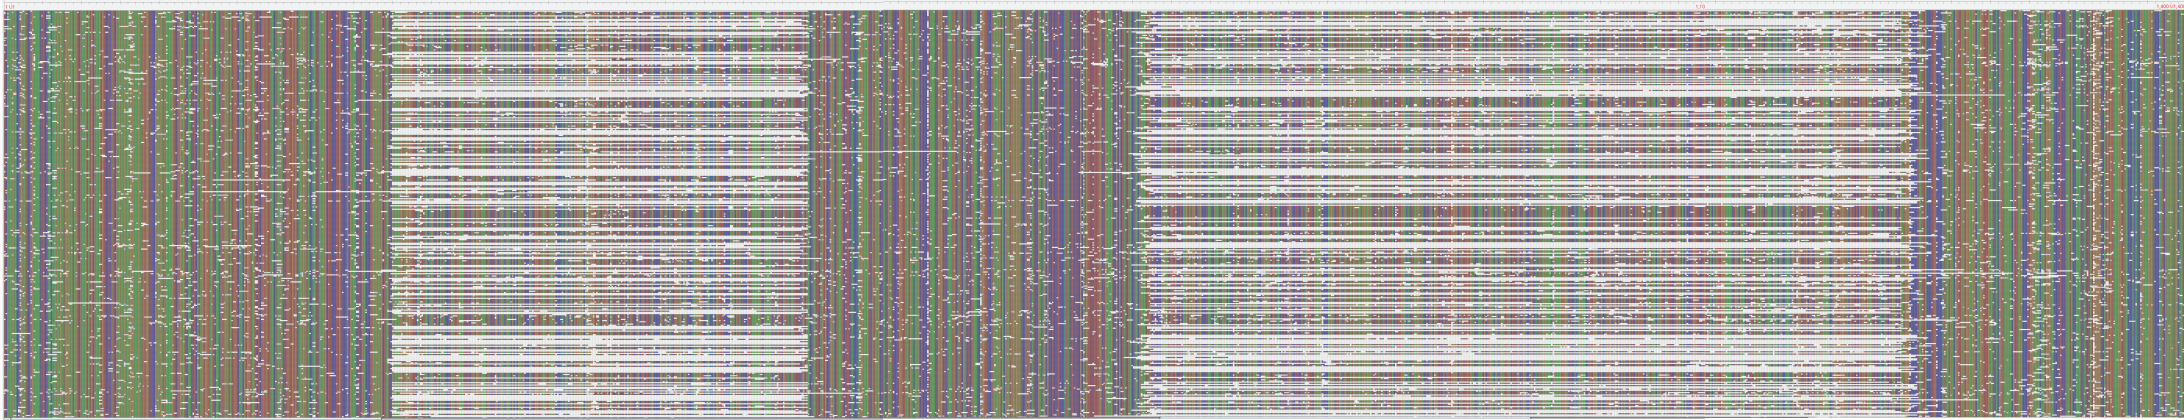

Supplement: ppat.1006365.s004.pdf [file ppat.1006365.s004.pdf]
