# Supplementary material for: Parallel ClickSeq and Nanopore sequencing elucidates the rapid evolution of defective-interfering RNAs in Flock House virus
Source: PubMed Central journal article supplement (PMC5435362; doi:10.1371/journal.ppat.1006365), 2017-05-05
Supplement: ppat.1006365.s007.pdf [file ppat.1006365.s007.pdf]

Supplemental Figure 7:

A)

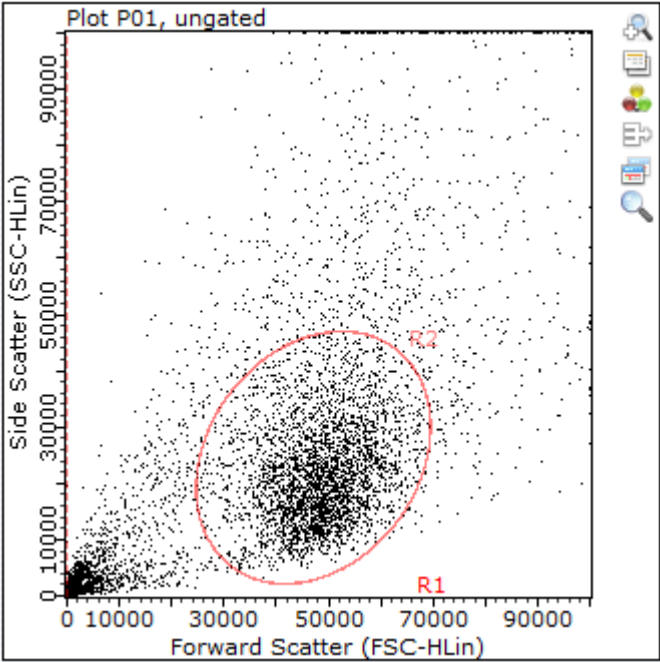

No Virus

B)

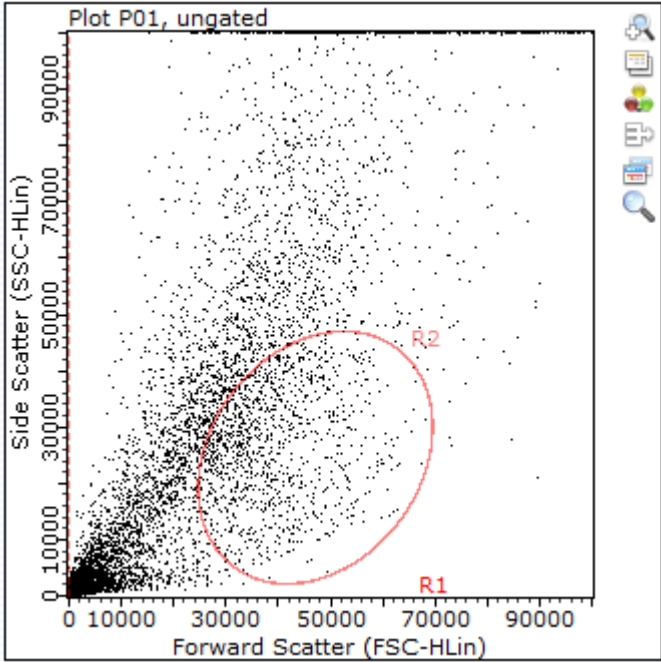

300,000 particles/cell

Passage 1 Replicate 2
