# Supplementary material for: Parallel ClickSeq and Nanopore sequencing elucidates the rapid evolution of defective-interfering RNAs in Flock House virus
Source: PubMed Central journal article supplement (PMC5435362; doi:10.1371/journal.ppat.1006365), 2017-05-05
Supplement: ppat.1006365.s008.pdf [file ppat.1006365.s008.pdf]

**Supplemental Table 1:**

| <i>Replicate 1</i>        | Passage 0  | Passage 1 | Passage 2  | Passage 3 | Passage 4 | Passage 5 | Passage 6 | Passage 7 | Passage 8 | Passage 9 |
|---------------------------|------------|-----------|------------|-----------|-----------|-----------|-----------|-----------|-----------|-----------|
| <b>Total Reads</b>        | 41 578 802 | 8 425 984 | 18 582 914 | 3 030 368 | 6 558 293 | 7 333 790 | 7 529 709 | 4 919 929 | 8 017 787 | 9 084 665 |
| <b>FHV Genome</b>         | 39 595 900 | 8 271 467 | 18 241 065 | 2 954 304 | 6 365 376 | 6 720 739 | 6 309 807 | 4 293 229 | 6 830 523 | 8 145 020 |
| <i>D. melanogaster</i>    | 1 057 037  | 89 123    | 177 811    | 31 802    | 28 179    | 137 249   | 503 422   | 164 721   | 234 721   | 216 618   |
| <b>FHV Recombinations</b> | 161 205    | 7 578     | 34 573     | 24 517    | 123 637   | 356 277   | 500 760   | 372 253   | 810 863   | 587 347   |
| RNA1-RNA1                 | 2 902      | 3 903     | 13 586     | 3 384     | 55 454    | 269 016   | 444 624   | 330 290   | 788 324   | 569 366   |
| RNA2-RNA2                 | 81 765     | 3 558     | 20 603     | 21 097    | 67 686    | 86 553    | 56 085    | 41 575    | 21 602    | 17 236    |
| Inter-RNA                 | 76 538     | 117       | 384        | 36        | 497       | 708       | 51        | 388       | 937       | 745       |
| Other                     | 141 332    | 5 730     | 11 198     | 2 807     | 8 639     | 26 571    | 38 128    | 19 573    | 39 776    | 33 892    |
| <b>Unmapped</b>           | 139 057    | 3 451     | 4 501      | 1 441     | 2 167     | 2 713     | 8 805     | 2 184     | 2 686     | 3 257     |

| <i>Replicate 2</i>        | Passage 1  | Passage 2  | Passage 3  | Passage 4 | Passage 5 | Passage 6 | Passage 7 | Passage 8 | Passage 9 |
|---------------------------|------------|------------|------------|-----------|-----------|-----------|-----------|-----------|-----------|
| <b>Total Reads</b>        | 11 303 746 | 30 630 462 | 15 720 784 | 9 438 862 | 9 526 140 | 7 118 697 | 4 316 239 | 9 249 953 | 8 108 519 |
| <b>FHV Genome</b>         | 11 121 111 | 29 693 227 | 15 243 341 | 9 229 809 | 8 996 228 | 6 293 323 | 3 953 100 | 8 162 144 | 7 088 432 |
| <i>D. melanogaster</i>    | 100 716    | 596 462    | 171 518    | 29 353    | 81 172    | 286 605   | 71 238    | 270 156   | 404 742   |
| <b>FHV Recombinations</b> | 9 259      | 46 962     | 192 737    | 126 061   | 377 703   | 409 316   | 246 959   | 679 389   | 437 566   |
| RNA1-RNA1                 | 5 103      | 25 052     | 24 809     | 46 225    | 241 048   | 333 125   | 204 609   | 566 092   | 376 893   |
| RNA2-RNA2                 | 3 845      | 20 919     | 167 464    | 79 550    | 136 141   | 75 424    | 42 076    | 111 895   | 59 650    |
| Inter-RNA                 | 311        | 991        | 464        | 286       | 514       | 767       | 274       | 1 402     | 1 023     |
| Other                     | 7 358      | 33 488     | 16 642     | 8 934     | 18 569    | 33 152    | 16 553    | 46 621    | 55 529    |
| <b>Unmapped</b>           | 3 779      | 9 879      | 3 026      | 2 952     | 3 569     | 4 084     | 1 631     | 2 690     | 3 549     |

| <i>Replicate 3</i>        | Passage 1  | Passage 2  | Passage 3  | Passage 4 | Passage 5 | Passage 6 | Passage 7 | Passage 8 | Passage 9 |
|---------------------------|------------|------------|------------|-----------|-----------|-----------|-----------|-----------|-----------|
| <b>Total Reads</b>        | 16 420 686 | 17 358 462 | 15 283 445 | 7 908 511 | 6 784 205 | 6 438 793 | 9 369 727 | 1 189 217 | 9 080 091 |
| <b>FHV Genome</b>         | 16 161 893 | 12 543 802 | 14 995 997 | 7 561 609 | 6 388 461 | 5 340 577 | 8 044 482 | 946 913   | 7 892 118 |
| <i>D. melanogaster</i>    | 137 322    | 215 958    | 117 684    | 33 721    | 72 896    | 391 630   | 307 068   | 99 476    | 351 639   |
| <b>FHV Recombinations</b> | 13 847     | 25 826     | 70 443     | 238 482   | 244 913   | 507 397   | 767 795   | 82 977    | 485 925   |
| RNA1-RNA1                 | 8 022      | 8 212      | 19 213     | 78 822    | 133 208   | 266 278   | 716 381   | 77 638    | 475 383   |
| RNA2-RNA2                 | 5 517      | 17 288     | 50 877     | 159 107   | 111 256   | 240 588   | 50 729    | 5 332     | 10 123    |
| Inter-RNA                 | 308        | 326        | 353        | 553       | 449       | 531       | 685       | 7         | 419       |
| Other                     | 9 893      | 31 671     | 10 589     | 36 275    | 41 337    | 79 144    | 149 528   | 31 665    | 235 665   |
| <b>Unmapped</b>           | 6 467      | 205 049    | 6 456      | 2 613     | 3 211     | 3 043     | 2 903     | 1 227     | 2 928     |
